# Supplementary material for: Blue carbon stocks and exchanges along the California coast
Source: Copernicus journal article supplement (doi:10.5194/bg-18-4717-2021), 2021-08-18
Supplement: Supplementary file 1 [file bg-18-4717-2021-supplement.pdf]

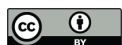

*Supplement of*

## **Blue carbon stocks and exchanges along the California coast**

**Melissa A. Ward et al.**

*Correspondence to:* Melissa A. Ward ([maward@ucdavis.edu](mailto:maward@ucdavis.edu))

The copyright of individual parts of the supplement might differ from the article licence.

### Supplementary Figures

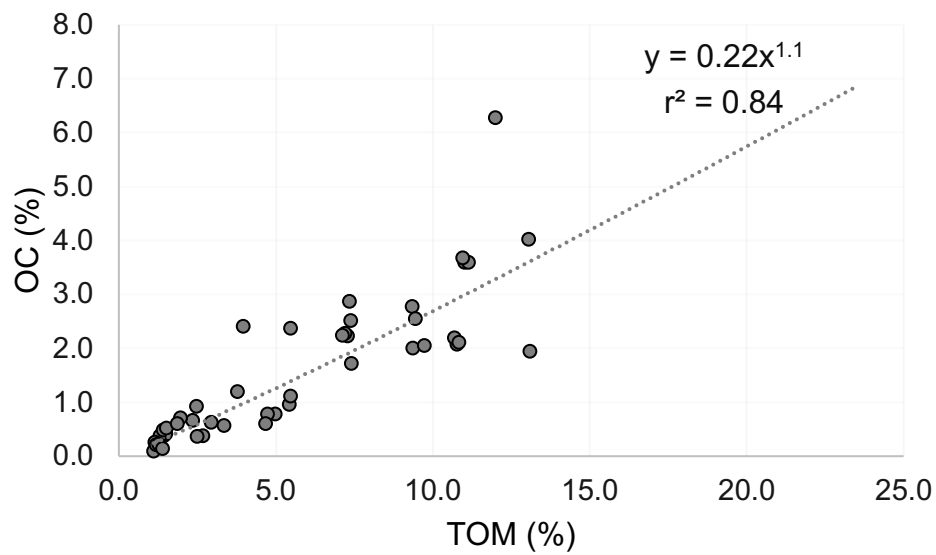

**Figure S1:** Total organic carbon (OC) was estimated using a power model developed between measured total organic material (TOM, %) and measured total OC (%) in a subset of samples. A power model was selected over a linear model for these data to avoid negative estimates of carbon stocks at low levels of TOM.

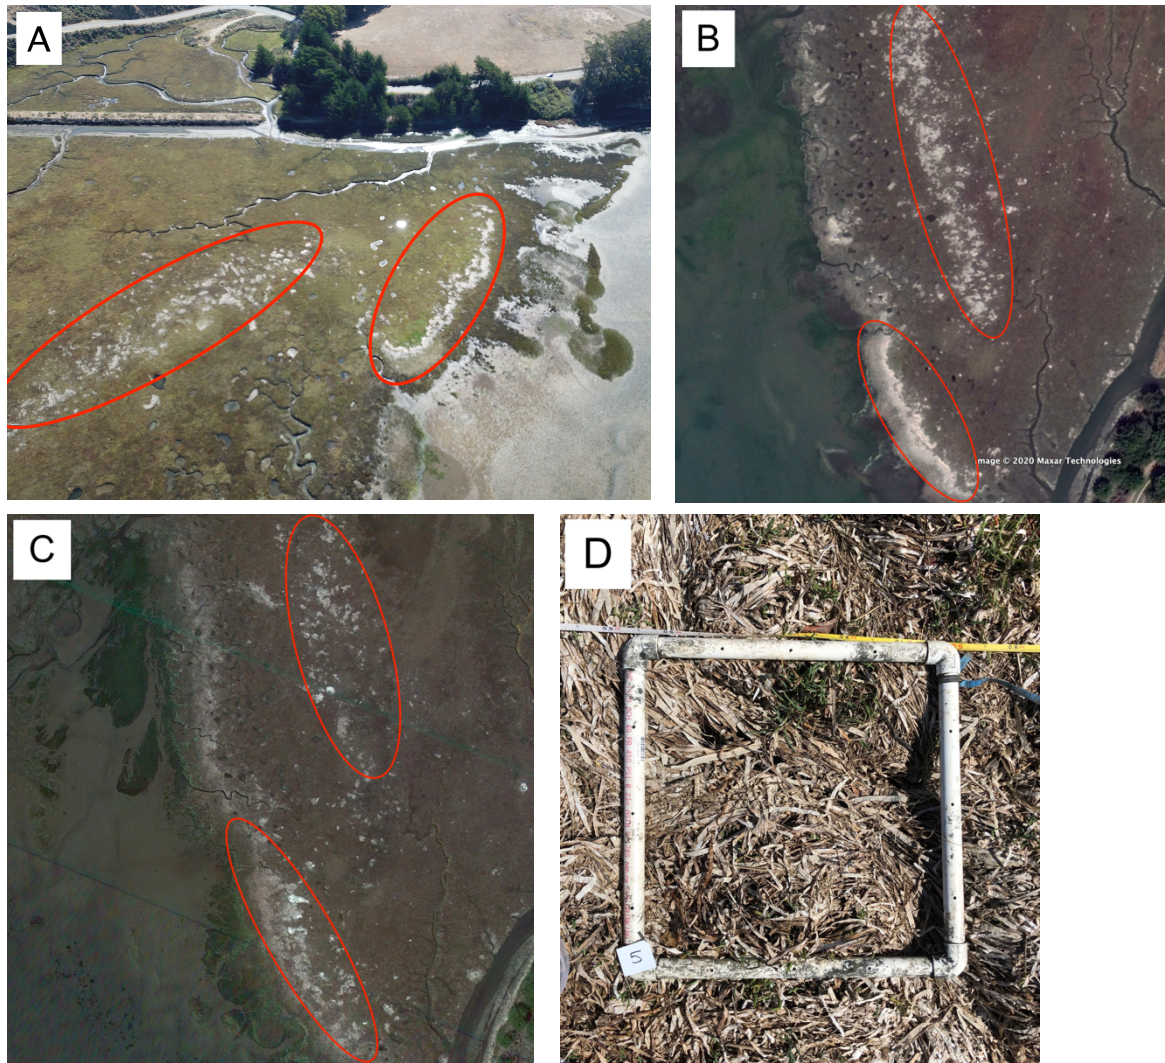

**Figure S2:** UAV (drone) image collected in October 2019 immediately prior to sediment core collection (A). Historic seagrass wrack lines can be observed in similar locations using satellite imagery, as shown here by the image taken on September 9<sup>th</sup>, 2018 and October 24<sup>th</sup>, 2009 (B and C, respectively; © Google Earth, 2020). Seagrass wrack lines are circled in red. Wrack biomass was measured from quadrats along a transect running through the southern wrack line (D).

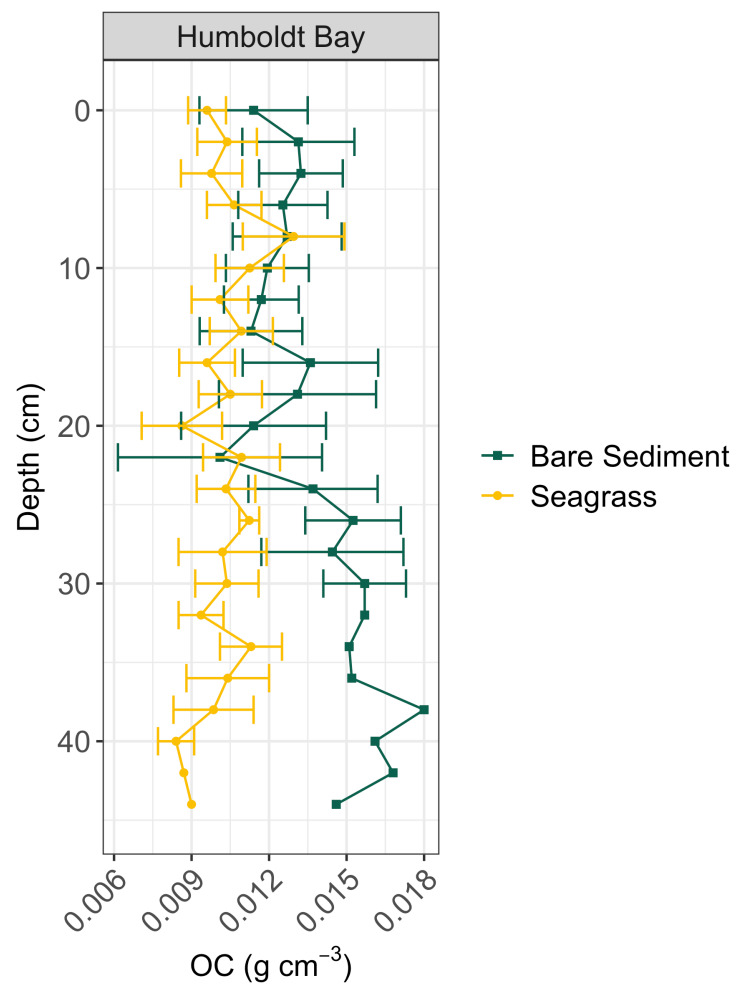

**Figure S3:** Average organic carbon ( $\text{g cm}^{-3}$ ) in each core depth interval for seagrass meadows and bare sediments in Humboldt Bay. These cores were sampled to 45 centimeters.

#### Supplementary Tables



| Site           | Habitat Type  | N (cores) | Bulk Density (g/cm <sup>3</sup> ) | Mud (%)   | OC (%)      | OC (kg/m <sup>2</sup> ) |
|----------------|---------------|-----------|-----------------------------------|-----------|-------------|-------------------------|
| Bodega Bay     | Bare Sediment | 3         | 2.5 ± 0.039                       | 13 ± 0.44 | 0.3 ± 0.011 | 1.5 ± 0.082             |
| Bodega Bay     | Seagrass      | 15        | 1.3 ± 0.18                        | 18 ± 2.5  | 1 ± 0.28    | 2.2 ± 2.1               |
| Elkhorn Slough | Pan           | 3         | 0.55 ± 0.027                      | 95 ± 1.4  | 5 ± 0.8     | 4.6 ± 0.77              |
| Elkhorn Slough | Salt Marsh    | 11        | 0.66 ± 0.095                      | 93 ± 1.8  | 4.6 ± 0.56  | 5.1 ± 1.3               |
| Humboldt Bay   | Bare Sediment | 3         | 1.4 ± 0.22                        | NA        | 0.91 ± 0.16 | 2.5 ± 0.67              |
| Humboldt Bay   | Seagrass      | 4         | 1.7 ± 0.38                        | NA        | 0.7 ± 0.14  | 2.1 ± 0.43              |
| Newport Bay    | Salt Marsh    | 4         | 0.85 ± 0.21                       | 76 ± 17   | 3.7 ± 1.1   | 3.4 ± 1.3               |
| Newport Bay    | Seagrass      | 4         | 0.66 ± 0.074                      | 98 ± 0.59 | 2.3 ± 0.24  | 2.9 ± 0.23              |
| Mission Bay    | Bare Sediment | 2         | 0.78 ± 0.12                       | NA        | 1.6 ± 0.21  | 2.6 ± 1                 |
| Mission Bay    | Seagrass      | 3         | 0.6 ± 0.012                       | NA        | 1.6 ± 0.26  | 1.8 ± 0.46              |
| Tomaes Bay     | Bare Sediment | 9         | 1.4 ± 0.32                        | 66 ± 15   | 1.6 ± 0.37  | 2.7 ± 1.6               |
| Tomaes Bay     | Salt Marsh    | 6         | 0.62 ± 0.088                      | 91 ± 1.9  | 5.2 ± 0.53  | 5.6 ± 2                 |
| Tomaes Bay     | Seagrass      | 15        | 1.5 ± 0.15                        | 35 ± 9    | 0.86 ± 0.17 | 2.1 ± 1.4               |

**Table S1:** Summary of sediment cores collected from each habitat type at each of the six sites. The displayed summary data are the mean values across all cores (± SE). Organic carbon stocks are presented in kg m<sup>-2</sup> in the top 20 cm of sediment.

| Site              | Source     | Mean (%) | 95% CI (low) | 95% CI (high) |
|-------------------|------------|----------|--------------|---------------|
| Walker Salt Marsh | Diatoms/C3 | 87.5     | 79.0         | 96.0          |
| Walker Salt Marsh | C4 Plants  | 7.6      | 0.0          | 16.7          |
| Walker Salt Marsh | Seagrass   | 4.8      | 0.0          | 11.3          |
| Elkhorn Slough    | Diatoms/C3 | 83.0     | 77.0         | 89.1          |
| Elkhorn Slough    | C4 Plants  | 11.9     | 1.1          | 21.0          |
| Elkhorn Slough    | Seagrass   | 5.1      | 0.0          | 12.0          |
| Under wrack?      | Source     | Mean (%) | 95% CI (low) | 95% CI (high) |
| Yes               | Diatoms/C3 | 86.1     | 76.1         | 95.8          |
| Yes               | C4 Plants  | 8.8      | 0.0          | 19.4          |
| Yes               | Seagrass   | 5.1      | 0.0          | 12.3          |
| No                | Diatoms/C3 | 79.5     | 72.7         | 86.5          |
| No                | C4 Plants  | 13.5     | 0.8          | 24.7          |
| No                | Seagrass   | 7.0      | 0.0          | 15.2          |
| Shallow Vs. Deep  | Source     | Mean (%) | 95% CI (low) | 95% CI (high) |
| Surface           | Diatoms/C3 | 78.7     | 69.7         | 87.7          |
| Surface           | C4 Plants  | 13.0     | 0.1          | 25.4          |
| Surface           | Seagrass   | 8.4      | 0.0          | 17.5          |
| Deep              | Diatoms/C3 | 79.7     | 69.2         | 90.2          |
| Deep              | C4 Plants  | 12.8     | 0.0          | 25.3          |
| Deep              | Seagrass   | 7.4      | 0.0          | 16.7          |

**Table S2:** Bayesian mixing model results display the mean (%) contribution of each source ( $\pm$  95% CI). These results are presented for salt marsh sediments in two sites – Walker salt marsh and Elkhorn salt marsh (Elkhorn Slough) (top panel); for salt marsh sediments in Walker salt marsh under persistent seagrass wrack lines versus not under persistent wrack lines (middle panel); and in shallow versus deep sediments found under wrack in Walker salt marsh (bottom panel).
